# Supplementary material for: Mapping groundwater abstractions from irrigated agriculture: big data, inverse modeling, and a satellite–model fusion approach
Source: Copernicus journal article supplement (doi:10.5194/hess-24-5251-2020), 2020-11-12
Supplement: Supplementary file [file hess-24-5251-2020-supplement.pdf]

Supplement of Hydrol. Earth Syst. Sci., 24, 5251–5277, 2020  
<https://doi.org/10.5194/hess-24-5251-2020-supplement>  
© Author(s) 2020. This work is distributed under  
the Creative Commons Attribution 4.0 License.

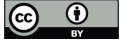

*Supplement of*

## **Mapping groundwater abstractions from irrigated agriculture: big data, inverse modeling, and a satellite–model fusion approach**

**Oliver Miguel López Valencia et al.**

*Correspondence to:* Oliver Miguel López Valencia ([oliver.lopez@kaust.edu.sa](mailto:oliver.lopez@kaust.edu.sa))

The copyright of individual parts of the supplement might differ from the CC BY 4.0 License.

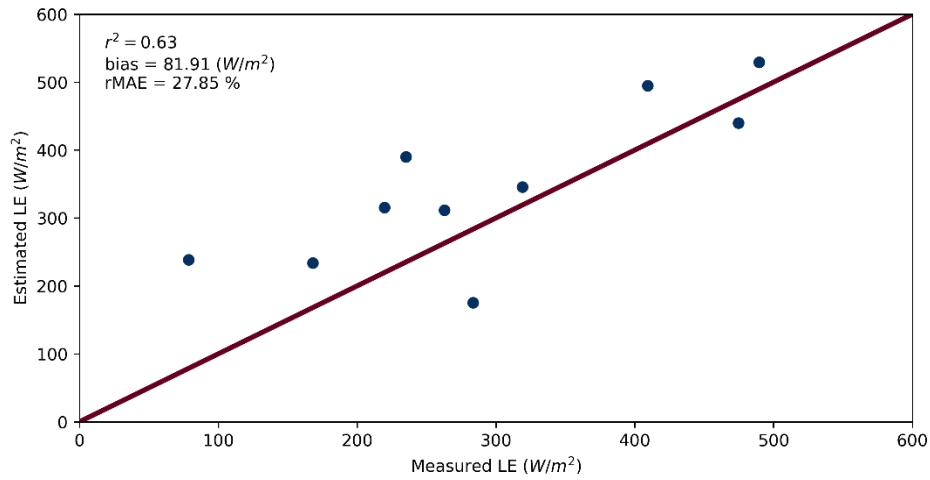

**Figure S1: Evaluation scatterplot of measured vs. estimated LE fluxes using the series-TSEB model approach over an irrigated maize field (Tawdeehiya farms) in 2016.**

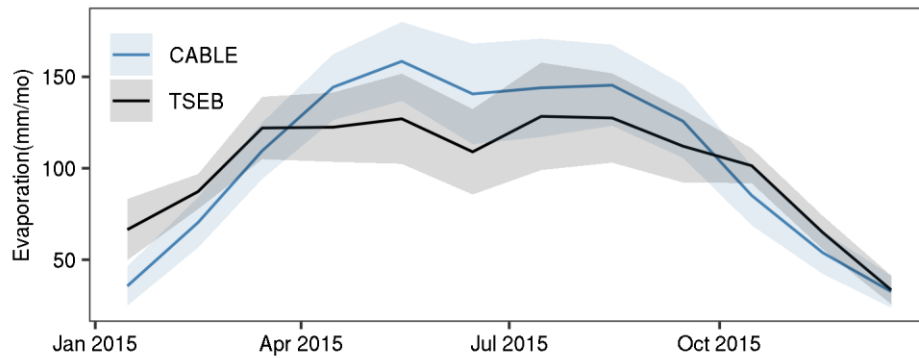

**Figure S2: Comparison of monthly evaporation between the satellite-based estimates (TSEB) and hydrological model runs (CABLE) with irrigation estimated by the model inversion strategy. The line represents the monthly average over all agricultural fields in Al Jawf, while the shaded area shows the average value  $\pm$  the standard deviation.**
